1           **Genome-wide multi-trait analysis of irritable bowel syndrome and**  
2           **related mental conditions identifies 38 new genetic hits**

3

4   Silvia Alemany\*<sup>1-3</sup>, María Soler Artigas<sup>1-4</sup>, Judit Cabana<sup>1-3</sup>, Dana Salim Fakhreddine<sup>1</sup>, Natalia  
5   Llonga<sup>1-2</sup>, Laura Vilar-Ribó<sup>1-3</sup>, Amanda Rodríguez-Urrutia<sup>1-3,5</sup>, Judit Palacio<sup>2</sup>, Ana María  
6   González-Castro<sup>6</sup>, Beatriz Lobo<sup>6-8</sup>, Carmen Alonso-Cotoner<sup>6-9</sup>, Magnus Simrén<sup>10-11</sup>, Javier  
7   Santos<sup>6-9</sup>, Josep Antoni Ramos-Quiroga<sup>1-3,5</sup>, Marta Ribasés\*<sup>1-4</sup>.

8

- 9   1. Psychiatric Genetics Unit, Group of Psychiatry Mental Health and Addiction, Vall d'Hebron  
10    Research Institute (VHIR), Universitat Autònoma de Barcelona, Barcelona, Spain.  
11   2. Department of Mental health, Hospital Universitari Vall d'Hebron, Barcelona, Spain.  
12   3. Biomedical Network Research Centre on Mental Health (CIBERSAM), Instituto de Salud  
13    Carlos III, Madrid, Spain.  
14   4. Department of Genetics, Microbiology, and Statistics, Faculty of Biology, Universitat de  
15    Barcelona, Barcelona, Spain.  
16   5. Department of Psychiatry and Forensic Medicine, Universitat Autònoma de Barcelona,  
17    Barcelona, Spain  
18   6. Laboratory of Neuro-Immuno-Gastroenterology, Digestive System Research Unit, Vall  
19    d'Hebron Institut de Recerca (VHIR), Vall d'Hebron Hospital Universitari, Barcelona,  
20    Spain.  
21   7. Department of Gastroenterology, Vall d'Hebron Hospital Universitari, Vall d'Hebron  
22    Barcelona Hospital Campus, Passeig Vall d'Hebron 119-129, 08035 Barcelona, Spain.  
23   8. Department of Medicine, Universitat Autònoma de Barcelona, Barcelona, Spain.  
24   9. Centro de Investigación Biomédica en Red de Enfermedades Hepáticas y Digestivas  
25    (CIBERHED), Instituto de Salud Carlos III, Madrid, Spain.  
26   10. Department of Molecular and Clinical Medicine, Institute of Medicine, Sahlgrenska  
27    Academy, University of Gothenburg, Gothenburg, Sweden.

28 11. Centre for Functional GI and Motility Disorders, University of North Carolina, Chapel Hill,  
29 North Carolina, USA.

30

31 **\*Corresponding authors:** Marta Ribasés and Silvia Alemany.

32 Psychiatric Genetics Unit, Group of Psychiatry Mental Health and Addiction, Vall d'Hebron

33 Research Institute (VHIR), Universitat Autònoma de Barcelona, Barcelona Spain. Passeig Vall

34 d'Hebron, 119-129, 08035 Barcelona, Spain Phone: +34 934894162. [marta.ribases@vhir.org](mailto:marta.ribases@vhir.org) ;

35 [silvia.alemany@vhir.org](mailto:silvia.alemany@vhir.org).

36 **ABSTRACT**

37 **Background:** Irritable bowel syndrome (IBS) is a chronic disorder of gut-brain  
38 interaction frequently accompanied by mental conditions, including depression and  
39 anxiety. Despite showing substantial heritability and being partly determined by a  
40 genetic component, the genetic underpinnings explaining the high rates of comorbidity  
41 remain largely unclear and there are no conclusive data on the temporal relationship  
42 between them. Exploring the overlapping genetic architecture between IBS and mental  
43 conditions may help to identify novel genetic loci and biological mechanisms  
44 underlying IBS and causal relationships between them.

45 **Methods:** We quantified the genetic overlap between IBS, neuroticism, depression and  
46 anxiety, conducted a multi-trait genome-wide association study (GWAS) considering  
47 these traits and investigated causal relationships between them by using the largest  
48 GWAS to date.

49 **Results:** IBS showed to be a highly polygenic disorder with extensive genetic sharing  
50 with mental conditions. Multi-trait analysis of IBS and neuroticism, depression and  
51 anxiety identified 42 genome-wide significant hits for IBS, of which 38 are novel. Fine-  
52 mapping risk loci highlighted 289 genes upregulated during early embryonic brain  
53 development and gene-sets related with psychiatric, digestive and autoimmune  
54 disorders. IBS-associated genes were enriched for target genes of anti-inflammatory and  
55 antirheumatic drugs, anesthetics and opioid dependence pharmacological treatment.  
56 Mendelian-randomization analysis accounting for correlated pleiotropy identified  
57 bidirectional causal effects between IBS and neuroticism and depression and causal  
58 effects of the genetic liability of IBS on anxiety.

59 **Conclusions:** These findings provide evidence of the polygenic architecture of IBS,  
60 identify novel hits for IBS and extend previous knowledge on the genetic overlap and  
61 relationship between gastrointestinal and mental disorders.

62 **Keywords:** Irritable bowel syndrome (IBS), neuroticism, depression, anxiety, multi-

63 trait genome-wide association study (MTAG)

64

## 65 INTRODUCTION

66 Irritable bowel syndrome (IBS) is one of the most prevalent disorders of gut-brain  
67 interaction with a population lifetime risk of 11% <sup>1</sup> and a point prevalence of 4.1%  
68 according to the strict Rome IV criteria <sup>2</sup>. IBS research is extremely challenging due to  
69 the multifactorial etiology of the disease and the heterogeneity of patients, who present  
70 high comorbidity rates for mental disorders, particularly, anxiety and depression, which  
71 impacts negatively on the patients' quality of life <sup>1,3,4</sup>.

72

73 A recent systematic review revealed that the prevalence of anxiety and depression  
74 symptoms among IBS patients is 39.1% and 28.8%, respectively <sup>5</sup>. In addition, IBS has  
75 been associated with more severe depressive symptoms compared to healthy controls  
76 and, when co-existing with psychiatric disorders, gastrointestinal symptoms are more  
77 severe and disabling <sup>6-11</sup>. This close association between IBS, anxiety and depression is  
78 also supported by neuroimaging studies and might be related to the bi-directional  
79 communication between the brain and the digestive system, termed the brain-gut-axis,  
80 which occurs through microbiota, neural, neuroimmune and neuroendocrine pathways  
81 <sup>12-14</sup>. This idea agrees with evidence indicating that psychiatric interventions, including  
82 antidepressants or cognitive-behavioral therapy, improve IBS patients functioning and  
83 suggests that common pathophysiological mechanisms may be underlying these  
84 conditions <sup>15</sup>.

85

86 IBS, anxiety and depression are partly determined by a genetic component and show  
87 substantial heritability ranging from 6% for IBS to 30%-50% for anxiety and depression  
88 <sup>16-18</sup>. The largest GWAS on IBS conducted to date included 53,400 cases and 433,201  
89 controls and identified six genome-wide significant loci <sup>18</sup> which represents an

90 improvement over the previous study identifying four independent hits <sup>19</sup>. Interestingly,  
91 among 173 traits, three mental conditions (neuroticism, depression and anxiety) were  
92 the most genetically correlated traits with IBS <sup>18</sup>. Despite these strong genetic  
93 correlations, the genetic underpinnings explaining the high rates of comorbidity  
94 between IBS and mental conditions remain largely unclear and there are no conclusive  
95 data on the temporal and causal relationship between them <sup>18,19</sup>.

96

97 In the present study we investigated the shared genetic architecture and the nature of the  
98 relationship between IBS and three highly genetically correlated conditions  
99 (neuroticism, depression and anxiety) using summary statistics of the largest GWAS  
100 datasets available so far by (i) estimating the genetic correlation and overlap between  
101 them, (ii) conducting a Multi-Trait Analysis of GWAS (MTAG) to identify novel  
102 genetic loci for IBS and (iii) performing downstream analyses to explore the overlapping  
103 genetic basis with other disorders and traits as well as causal relationships between  
104 them.

105

## 106 **MATERIALS AND METHODS**

### 107 **Samples**

108 We used publicly available SNP-level GWAS summary statistics for IBS <sup>18</sup>,  
109 neuroticism <sup>20</sup>, depression <sup>21</sup> and anxiety (Table 1). For further details see  
110 Supplementary Note 1.

111

### 112 **SNP-based heritability genetic correlation and overlap**

113 SNP heritability ( $h^2_{\text{SNP}}$ ) and pair-wise genetic correlation between IBS and each mental  
114 condition was calculated using linkage disequilibrium score regression (LDSC) analysis

115 <sup>22</sup>. Conversion of  $h^2_{\text{SNP}}$  estimates from observed to liability scale was done using a  
116 population prevalence of 11% , 25%, 30% and 14% for IBS, neuroticism, depression  
117 and anxiety, respectively. Polygenic overlap between IBS and each mental condition  
118 was quantified using MiXeR <sup>23</sup>. MiXeR calculates the number of trait-influencing loci  
119 for each trait (univariate model) and for both traits (bivariate model) and the proportion  
120 of variants with concordant direction of effects for both traits. The proportion of SNPs  
121 shared by two traits is indicated by the Dice coefficient. Model fit was assessed using  
122 the Akaike Information Criterion (AIC). For further details see Supplementary Note 2.

123

#### 124 **Multi-Trait Analysis of GWAS (MTAG)**

125 To identify new loci for IBS, SNP-level GWAS for IBS, neuroticism, depression and  
126 anxiety were meta-analyzed using MTAG <sup>24</sup>. To discard inflation in our results we  
127 calculated the max-false discovery rate (max-FDR) using the default settings as  
128 previously described <sup>24,25</sup>. Independent lead SNPs from MTAG-IBS results ( $P$ -value<5-  
129 E08) were identified through clumping ( $r^2=0.05$ , kb=5000) using the 1000 Genomes  
130 Project Phase 3 European reference panel (<http://www.internationalgenome.org/>) and  
131 PLINK1.09 as described by Eijbouts et al. <sup>18</sup>. We carried out conditional analyses to  
132 evaluate independence between secondary (within 5000kb and  $r^2<0.2$ ) and index  
133 variants within each locus using COJO implemented in Genome-wide Complex Trait  
134 Analysis (GCTA) <sup>26</sup>. For further details on conditional analysis see Supplementary Note  
135 3.

136

#### 137 **Credible variants and functional annotation**

138 Sets of credible variants (credible-sets) were identified by fine-mapping the independent  
139 lead SNPs of MTAG-IBS using three different tools , FINEMAP 1.3.1 <sup>27</sup>, PAINTOR

140 v3.0<sup>28</sup> and CAVIARBF v.0.2.1<sup>29</sup> following the pipeline available elsewhere<sup>30</sup>.  
141 Variants located in a region of 5000 kb around the lead SNPs were included in the  
142 analysis and we assumed that there was only one causal variant per locus. We used the  
143 recommended parameters of each tool and only variants identified by all three methods  
144 were considered. Functional annotation of the credible variants was conducted using  
145 FUMA<sup>31</sup>. For further details see Supplementary Note 4.

146

#### 147 **Gene-based and gene-set analyses of MTAG-IBS results**

148 Gene-based and gene-set analyses of MTAG-IBS risk loci were performed using  
149 MAGMA v1.08<sup>32</sup> implemented in FUMA<sup>31</sup>. Tissue specific gene expression was  
150 explored using MAGMA gene-property analysis of expression data from GTEx v8 and  
151 BrainSpan available in FUMA (databases detailed in Supplementary Note 5). All gene  
152 sets were obtained from the Molecular Signatures Database (MSigDB v6.2) and  
153 included GO, KEGG, BIOCARTA and Reactome representing a total of 11,960 gene  
154 sets. The Bonferroni-corrected significance threshold was  $0.05/11960$  gene sets =  $4.18E-$   
155  $06$ .

156

#### 157 **Drug target identification**

158 To explore whether finemapped genes related with IBS were enriched for target genes  
159 of drugs (druggable genes) we performed enrichment analysis based on information  
160 from the PharmGKB using WebGestAlt<sup>33</sup>. Identified drugs were classified according to  
161 available information from the Anatomical Therapeutic Chemical (ATC) classification  
162 system.

163



## 164 **Partitioned heritability and genetic correlations**

165 We partitioned  $h^2_{\text{SNP}}$  of MTAG-IBS results by functional annotation categories using  
166 stratified LDSC<sup>34</sup>. We calculated whether any of the 28 specific genomic categories  
167 included in the analysis was enriched for variants that contribute to  $h^2_{\text{SNP}}$ . Annotations  
168 for these functional genomic categories (e.g. coding or regulatory regions) were  
169 obtained from LDSC website ([https://github.com/bulik/ldsc/wiki/Partitioned-](https://github.com/bulik/ldsc/wiki/Partitioned-Heritability)  
170 [Heritability](https://github.com/bulik/ldsc/wiki/Partitioned-Heritability)). We focused on categories extended by 500bp in either direction.  
171 Enrichment/depletion of heritability in each category is calculated as the proportion of  
172 heritability attributable to SNPs in the specified category divided by the proportion of  
173 total SNPs annotated to that category. The Bonferroni-corrected significance threshold  
174 was  $0.05/28$  annotations= $0.0021$ .

175

176 We explored genetic correlations between our MTAG-IBS results and gastrointestinal,  
177 immunological and psychiatric disorders using LDSC analysis<sup>22</sup>. We selected all  
178 GWAS summary statistics of gastrointestinal/abdominal, immunological/systemic (UK  
179 Biobank: 21 phenotypes) and psychiatric disorders (PGC: 7 phenotypes) available in the  
180 MR-Base database (Supplementary Table 14)<sup>35</sup>. We used GWAS summary statistics  
181 including both males and females of European ancestry. If several GWAS were  
182 available for the same disorder, we chose the study with the largest effective sample  
183 size ( $N_{\text{effective}} = 4N_{\text{ca}}N_{\text{co}}/(N_{\text{ca}}+N_{\text{co}})$ ). The Bonferroni-corrected significance  
184 threshold used was  $0.05/28$  traits= $0.0018$ .

185

## 186 **Causal analysis using summary effect estimates (CAUSE)**

187 Causal relationships between IBS and correlated traits were assessed considering  
188 independent variants ( $r^2=0.05$ ; kb=5000) associated with the exposure with  $P<1.0E-03$

189 using CAUSE<sup>36</sup>. Bidirectional relationships were tested considering IBS as exposure  
190 and depression, anxiety or neuroticism as outcomes and vice-versa. Given that SE was  
191 not available from the largest study on neuroticism to date<sup>37</sup>, we used the GWAS  
192 dataset on neuroticism by Luciano et al. in 329,821 subjects as an alternative<sup>38</sup>. The  
193 strengths of CAUSE involve accounting for correlated horizontal pleiotropic effects (i.e.  
194 when a variant affects the outcome and the mediator through shared heritable factors)  
195 and using a less stringent significance threshold ( $P < 1.0E-3$ ) allowing the incorporation  
196 of more variants to the analyses. CAUSE compares two nested models, a sharing and a  
197 causal model. Both models allow for horizontal pleiotropy (correlated pleiotropy ( $\eta$ ))  
198 but only the casual model includes a causal effect parameter ( $\gamma$ ). The sharing and  
199 the causal model are compared against a null model and against each other. Model  
200 comparisons are carried out using the expected log pointwise posterior density (ELPD),  
201 a Bayesian model comparison approach that estimates how well the posterior  
202 distributions of a particular model are expected to predict a new set data. When  $P < 0.05$   
203 the second model fits the data better than the first model. There is evidence of causal  
204 effects when the causal model represents a significant improvement in the model fit of  
205 the sharing model.

206 For further details see Supplementary Note 9.

207

## 208 **RESULTS**

### 209 *SNP-based heritability, genetic correlation and overlap*

210 The latest GWAS on IBS<sup>18</sup>, neuroticism<sup>20</sup>, depression<sup>21</sup> and anxiety used herein are  
211 summarized in Table 1 and Supplementary Note 1. The estimated SNP heritability  
212 ( $h^2_{\text{SNP}}$ ) was 6.9% (SE=0.004) for IBS, 14.6% (SE=0.005) for neuroticism, 9.9%  
213 (SE=0.004) for depression and 8.3% (SE=0.011) for anxiety (Table 2). We found

214 evidence of strong genetic correlation between IBS and all three mental conditions,  
215 ranging from 53% to 68% (Table 2). Univariate MiXeR analysis revealed that IBS and  
216 neuroticism were highly polygenic, with around twelve thousand variants explaining  
217 90% of SNP heritability (12,438 variants for IBS and 12,308 for neuroticism;  
218 Supplementary Table 1a). Bivariate MiXeR analysis showed that the majority of the  
219 variants influencing IBS were shared with neuroticism (10,793 (SE=1.094) out of  
220 12,438 (SE=1.305) variants, Dice coefficient=0.87), with a high proportion of variants  
221 being concordant (71%) (Supplementary Table 1a and Supplementary Figure 1).  
222 Unfortunately, MiXeR was unable to accurately quantify the genetic overlap between  
223 IBS and depression or anxiety according to the Akaike Information Criterion (AIC;  
224 Supplementary Table 1b).

225

### 226 ***Multi-Trait Analysis of GWAS (MTAG)***

227 To identify novel loci for IBS, we combined the summary statistics from the GWAS on  
228 IBS, neuroticism, depression and anxiety using MTAG, increasing the estimated  
229 effective sample size from 486,601 in the original IBS dataset to 887,490. The max-  
230 FDR of MTAG-IBS analysis was low (0.020) suggesting no inflation, consistent with  
231 the similar mean chi-square values for the different GWAS, ranging from 1.08 for  
232 anxiety to 1.69 for neuroticism. After MTAG analysis, the number of genome-wide  
233 significant SNPs for IBS increased from six in the original GWAS to 42 independent  
234 SNPs in 37 loci in the current study (Figure 1, Supplementary Figure 2, Table 3 and  
235 Supplementary Table 2). Comparing these results with the ones originally described for  
236 IBS<sup>18</sup>, 38 out of the 42 SNPs identified herein were novel for IBS and all of them  
237 showed consistent direction of the association (Figure 1a and Supplementary Table 3).  
238 Of them, 11 were not previously associated with neuroticism, depression or anxiety

239 (Figure 1d). The remaining signals, 27 in total, were novel risk loci for IBS but  
240 previously reported for neuroticism and/or depression (Table 3, Figure 1d) and overall  
241 showed consistent direction of association with that reported in the original studies  
242 (Figure 1a). Of the six loci previously identified in IBS<sup>18</sup>, four of them, on chromosome  
243 3, 6, 9 and 11, were among the significant loci for IBS in the current study and the two  
244 additional ones, in chromosome 13, showed suggestive evidence of association ( $P < 5E-$   
245  $07$ ; Table 3). Among top findings, we found lead SNPs nearby genes involved in  
246 transcriptional regulation, including non-coding RNAs (*RP11-629G13.1* and *MSH5-*  
247 *SAPCD1*), RNA splicing (*CELF4*), chromatin remodeling (*EP300* and *HIST1H3J*),  
248 mRNA transport (*FAM120A*) or nucleic acid binding (*TCF4* and *ELAVL2*), as well as in  
249 brain development (*TMEM161B*) or presynaptic activity (*PCLO*).

250

### 251 ***Credible variants and functional annotation***

252 We identified a total of 1,818 Bayesian credible variants in the 37 independent loci for  
253 IBS (Supplementary Table 4). Their functional annotation revealed over-presentation of  
254 SNPs in introns (64.6%), intergenic regions (21.7%) or located in non-coding RNA  
255 (9.4%) (Figure 2 and Supplementary Table 5). A total of 75% of the variants within  
256 credible sets were located in open chromatin regions (minimum chromatin state  $\leq 7$ ),  
257 3% were likely to affect the binding of transcription factors (RegulomeDB scores from  
258 1b to 2c) and 0.05% may be deleterious (Combined Annotation Dependent Depletion  
259 (CADD) score  $> 12.37$ ) (Figure 2 and Supplementary Table 5). Forty-eight variants  
260 were previously related by GWAS ( $P < 5E-07$ ) to digestive-related phenotypes (e.g.  
261 inflammatory bowel disease, gastroesophageal reflux or gut microbiota relative  
262 abundance), lifestyle factors (e.g. alcohol consumption, lifetime smoking, coffee  
263 consumption or moderate to vigorous physical activity levels) and brain and

264 neuropsychiatric phenotypes (e.g. neuroticism, depression, anxiety, cognition or brain  
265 morphology) (Supplementary Table 6). In addition, we found that more than half of the  
266 credible variants ( $n=953$ ; 52%) were expression quantitative trait loci (eQTL) for at  
267 least one gene in one brain area ( $n=895$ ; 49%) and/or digestive tissue ( $n=690$ ; 38%;  
268 Supplementary Table 7).

269

270 Credible variants were mapped to 289 unique genes (Supplementary Table 8) that were  
271 significantly enriched in genes upregulated during early embryonic brain development  
272 (8th post conceptual week; Supplementary Figure 3) and in several gene-sets  
273 (Supplementary Table 9). Among the most significant ones, we found psychiatric  
274 disorders (GWAS catalog: autism spectrum disorder or schizophrenia,  $P$ -  
275 adjusted= $4.96E-193$ ), digestive disorders (GWAS catalog: ulcerative colitis,  $P$ -  
276 adjusted= $1.13E-57$  and inflammatory bowel disease,  $P$ -adjusted= $7.05E-40$ ),  
277 autoimmune disease (KEGG: Systemic lupus erythematosus,  $P$ -adjusted= $7.91E-61$ ) and  
278 histone deacetylases (Reactome: HDACS deacetylate histones,  $P$ -adjusted= $3.09E-46$ )  
279 (Supplementary Table 9).

280

### 281 ***Gene-based and gene-set analyses of MTAG-IBS risk loci***

282 The gene-based analysis identified 76 significant genes, which were associated with  
283 expression changes in the cerebellum ( $P=5.2E-09$ ), frontal cortex ( $P=9.8E-07$ ), anterior  
284 cingulate cortex ( $P=1.8E-05$ ), basal ganglia nuclei (nucleus accumbens:  $P=6.9E-05$ ;  
285 caudate:  $P=9.7E-04$ ) and hypothalamus ( $P=4.3E-04$ ) (Supplementary Table 10,  
286 Supplementary Figure 4) as well as with gene expression during the 21<sup>st</sup> post  
287 conceptual week ( $P=8.5E-04$ ) (Supplementary Figure 5). Among top findings, we found  
288 genes with a role in brain development and synaptic function, including *CADM2* and

289 *NCAMI*, previously identified in the latest GWAS on IBS, and also genes involved in  
290 transcriptional regulation through mRNA transport or chromatin structure, including  
291 *FAM120A*, *PHF2* and different histone coding genes. When we conducted the gene-set  
292 analysis we found the *branching morphogenesis of a nerve* pathway significantly  
293 associated with IBS (gene-set size=10 genes;  $P= 1.7E-06$ ) (Supplementary Table 11).

#### 294 ***Drug target identification***

295 The enrichment analysis on druggable genes showed enrichment of MTAG-IBS-  
296 finemapped credible genes in druggable genes for 21 drugs (Supplementary Table 12),  
297 being l-lysine ( $P < 2.2E-16$ ), belinostat ( $P=8.6E-10$ ), s-adenosylmethionine ( $P=7.0E-$   
298  $09$ ) and allopurinol ( $P=1.5E-07$ ), the top ones (Supplementary Table 12). They also  
299 included drugs related to musculo-skeletal system, such as anti-inflammatory and  
300 antirheumatic drugs, or related to the nervous system, such as anesthetics and drugs  
301 used in opioid dependence (Supplementary Table 12).

302

#### 303 ***Partitioned heritability and genetic correlations***

304 When we partitioned the  $h^2_{\text{SNP}}$  of IBS, we observed significant heritability enrichment  
305 in seven functional categories (Figure 2 and Supplementary Table 13), with the  
306 strongest enrichment of variants in conserved regions (enrichment=2.01;  $P=4.0E-09$ ),  
307 DNase I hypersensitive sites (DHSs) regions (enrichment=1.66;  $P=9.1E-08$ ) and histone  
308 H3 lysine 9 acetylation (H3K9ac) peaks (enrichment=6.88;  $P=1.1E-07$ ).

309

310 We found significant genetic correlations between IBS and 13 gastrointestinal,  
311 immunological or psychiatric disorders using GWAS summary statistics available in the  
312 MR-Base database<sup>35</sup>, including gastric reflux ( $rg=0.51$ ;  $P=2.6E-36$ ), the cross-disorder

313 GWAS from the PGC involving schizophrenia, bipolar disorder, major depressive  
314 disorder, autism spectrum disorders (ASD) and attention-deficit/hyperactivity disorder  
315 (ADHD) ( $rg=0.44$ ,  $P=9.7E-46$ ), diverticulitis ( $rg=0.44$ ,  $P=7.4E-22$ ), hiatus hernia  
316 ( $rg=0.43$ ;  $P=4.7E-20$ ) and chronic fatigue syndrome ( $rg=0.39$ ,  $P=2.0E-04$ ), among  
317 others (Figure 2 and Supplementary Table 14).

318

### 319 *Causal analysis using summary effect estimates (CAUSE)*

320 CAUSE<sup>36</sup> showed consistent evidence for a causal effect of the genetic liability of IBS  
321 on neuroticism ( $\Delta ELPD=-3.6$ ,  $SE=1.9$ ,  $P=0.031$ ), depression ( $\Delta ELPD=-5.9$ ,  $SE=1.8$ ,  
322  $P=5.4E-03$ ) and anxiety ( $\Delta ELPD=-2.9$ ,  $SE=1.7$ ,  $P=0.049$ ). We also found evidence for  
323 reverse causality with a causal effect of the genetic liability of neuroticism and  
324 depression on IBS ( $\Delta ELPD=-7.3$ ,  $SE=1.4$ ,  $P=1.5E-07$  and  $\Delta ELPD=-6.3$ ,  $SE=1.4$ ,  
325  $P=1.8E-06$  respectively) but there was no evidence for a causal relationship when  
326 anxiety was considered as exposure and IBS as outcome (Figure 2, Supplementary  
327 Table 15a and 15b and Supplementary Figure 6).

328

329

## 330 **DISCUSSION**

331 In the present study we found extensive genetic sharing between IBS, neuroticism,  
332 depression and anxiety, and identified 42 genome-wide significant hits for IBS, of  
333 which 38 are novel. Our findings confirm the polygenic architecture of the disorder,  
334 with more than 12,000 variants explaining 90% of the  $h^2_{\text{SNP}}$ , and represent a great  
335 advance over the previously reported six genome-wide risk loci <sup>18</sup>. Significant signal  
336 enrichment was found in genes showing heightened expression in the brain during early  
337 embryonic development and playing prominent roles in mental and digestive disorders,  
338 autoimmune diseases and transcription regulation.

339

340 Our results confirm a role on IBS of genes involved in brain development and synaptic  
341 function as well as genes previously associated with psychiatric conditions <sup>18</sup>. We  
342 detected 27 loci for IBS also associated with at least one of the three mental conditions  
343 under study, and found evidence supporting that IBS and neuroticism, which is  
344 genetically correlated with many psychiatric disorders <sup>39</sup>, share a considerable  
345 proportion of their genetic background. The widespread common genetic risk sharing  
346 with mental conditions was further supported by the positive genetic correlation found  
347 between IBS and many psychiatric disorders (i.e. schizophrenia, ADHD, autism or  
348 depression) and by the IBS associated variants being located within genes significantly  
349 expressed in the brain. These results are in agreement with the higher burden of mental  
350 disorders often co-existing in IBS patients, add further evidence of substantial  
351 pleiotropy of contributing loci and underscore that genetic influences on IBS may  
352 transcend diagnostic boundaries.

353



354 Among top findings we identified genes associated with IBS in previous GWAS, such  
355 as *CADM2* and *NCAM1*, members of the synaptic cell adhesion molecules that play a  
356 role in synapse organization and plasticity<sup>40,41</sup>. Interestingly, NCAM peptide mimetics  
357 have been proven to have both antidepressant and anti-inflammatory effects<sup>42,43</sup>,  
358 pointing them as a potential therapeutic target for IBS. Novel loci for IBS include  
359 interesting genes previously associated with depression and other mental disorders, such  
360 as *RERE*, that regulates retinoic acid signaling during development<sup>44-46</sup>, *PCLO*,  
361 involved in synaptic vesicle trafficking, *TMEM161B*<sup>47</sup>, a brain-expressed  
362 transmembrane protein<sup>48</sup>, *RBFOX1*, a splicing regulator mainly expressed in neurons,  
363 that is one of the most pleiotropic genes among psychiatric disorders<sup>49</sup> or *DRD2*,  
364 encoding the dopamine receptor D2R and one of the strongest candidates for psychiatric  
365 disorders and traits<sup>50</sup>. Interestingly, several studies in animal models suggested an  
366 important role for dopamine signaling both in the development and progression of  
367 inflammatory bowel disease<sup>51</sup> and treatment with D2R agonists decreased the severity  
368 of ulcerative colitis in mice and rats<sup>52</sup>.

369

370 We also provide new insights underlying IBS, showing strong evidence of  
371 transcriptional regulation mechanisms playing a role in the disorder, including non-  
372 coding RNAs and histone modification. We found genes encoding histones and histone  
373 modifying enzymes among top findings, and enrichment of IBS associations in histone  
374 acetylation and methylation peaks and in target genes for the histone deacetylase  
375 inhibitor belinostat<sup>53</sup>. These findings are in agreement with previous results involving  
376 chromatin modifications in maintenance of anxiety behavior and nociception and in  
377 visceral hypersensitivity induced by early-life stress<sup>54,55</sup>. Additionally, top findings also  
378 include non-coding RNAs, an epigenetic mechanism that has been involved in

379 regulation of genes related with visceral pain response and intestinal permeability<sup>56-58</sup>.

380 These results add additional evidence towards the role of epigenetic programming in

381 inflammation, visceral pain as well as in intestinal permeability, sensibility and motility

382 in both humans and animal models of IBS<sup>54,55,59,60</sup>.

383

384 Despite many of the findings pointing out neurobiological processes and mental

385 disorders, we also detected links between IBS and gastrointestinal-related phenotypes.

386 Fine mapping showed that 38% of the credible variants were eQTLs for at least one

387 digestive tissue and that credible sets were located in genes enriched in different

388 digestive disorders, including ulcerative colitis and inflammatory bowel disease. In

389 addition, positive genetic correlations were found between IBS and gastric reflux,

390 diverticulitis, hiatus hernia, cholelithiasis/gallstones and gastric/stomach ulcers, among

391 others, which adds evidence on the overlap between the genetic risk for IBS and for

392 other digestive-related disorders and traits. These findings may reflect the multi-

393 factorial etiology proposed for IBS involving psychological factors, abnormal brain

394 functioning and dysregulation of brain-gut interactions<sup>15,61-63</sup>, as previously proposed in

395 different psychiatric disorders such as depression<sup>64</sup>.

396

397 IBS-associated signals were also enriched in target genes of relevant drugs, including l-

398 lysine or S-adenosylmethionine. L-lysine acts as partial serotonin 5-HT<sub>4</sub> receptor

399 antagonist and inhibits serotonin-mediated intestinal pathologies in rats, including

400 anxiety and stress-induced fecal excretion and severity of diarrhea<sup>65</sup>. Interestingly, l-

401 lysine, and other 5-HT<sub>4</sub> receptor antagonists, are promising targets for the treatment of

402 diarrhea-predominant IBS<sup>66,67</sup> and may aminorate serotonin disturbances in gut and

403 brain that account for part of intestinal and mental disorders<sup>65</sup>. Additional drugs of

404 interest include S-adenosylmethionine, involved in neurotransmission signaling that has  
405 a putative antidepressant effect<sup>68,69</sup> or allopurinol that improves inflammatory bowel  
406 disease clinical outcomes<sup>70</sup>, among others.

407

408 Despite the high prevalence of psychiatric comorbidities reported in patients with IBS,  
409 particularly anxiety and depression, a clear temporal relationship between them has not  
410 been well established. We found evidence for a bidirectional causal effect between IBS  
411 and neuroticism or depression when accounting for correlated pleiotropy, which  
412 strengthens previous evidence<sup>18</sup>. In addition, we found evidence for a causal effect of  
413 the genetic liability of IBS on anxiety. These findings support that IBS increases the risk  
414 of subsequent depressive and anxiety disorders described in longitudinal study designs  
415<sup>71</sup> and also previous evidence supporting that prior depression raises the risk of  
416 developing IBS<sup>72,73</sup>. We found, however, no evidence for a causal effect of the genetic  
417 liability of anxiety on IBS when accounting for correlated pleiotropy, in line with  
418 previous results<sup>18</sup>. Although the sample size for anxiety was more limited and these  
419 results may also reflect lack of statistical power. Long term follow-up studies as well as  
420 larger datasets and sensitivity analyses are required to confirm the robustness of these  
421 results and to better understand the temporal relationship between IBS and comorbid  
422 mental conditions.

423

424 A major strength of our study is the substantial larger sample size compared with  
425 previous studies. By conducting meta-analysis of GWAS summary statistics for IBS  
426 and comorbid mental conditions with MTAG we increased the effective sample size  
427 from 486,601 in the original IBS dataset to 887,490 individuals and the number of IBS  
428 genome-wide significant loci from six in the single-trait analysis to 42. Thirty-eight of

429 them were novel for IBS and 11 were not associated with any of the mental conditions  
430 under study, which highlight that MTAG combining GWAS on IBS and mental  
431 conditions is a robust strategy to identify trait specific genetic associations. In addition,  
432 four of the previously six identified loci were also significant in the present study <sup>18</sup>.  
433 Even though two identified loci demonstrated less association here, their associations  
434 were still suggestive ( $P < 5E-07$ ) and in concordance in the direction of the effect with  
435 the original GWAS study on IBS, which supports validity of the findings across studies.  
436

437 The study, however, should be considered in the context of some limitations: (i) We did  
438 not account for phenotypic overlap and cannot discard that comorbid conditions may  
439 have biased the observed results. Also, IBS is considered a highly heterogenous  
440 disorder with pathophysiological differences observed among clinical subtypes,  
441 between genders, and across age groups and geographic locations <sup>1</sup>. Accounting for  
442 such factors may contribute to better characterize the disorder, capture its genetic  
443 background and identify overlap with other comorbid disorders that may impact on IBS  
444 risk, prognosis and clinical outcome <sup>6</sup>; (ii) Despite the strong genetic correlation  
445 between IBS and the three mental conditions under study, MiXeR was unable to assess  
446 the genetic overlap between IBS, depression and anxiety probably due to the high  
447 polygenicity and low SNP heritability estimates for these traits (0.083 and 0.099,  
448 respectively) and the limited sample size of the original GWAS on anxiety. We cannot  
449 discard, either, that due to lack of power we did not detect IBS signals previously  
450 reported for anxiety in the original GWAS or evidence for anxiety increasing the risk  
451 for IBS in the causality analyses; (iii) Combining GWAS that differ a great deal in  
452 power may lead to inflation of FDR, according to MTAG authors <sup>24</sup>. In this study we  
453 combined GWAS with different sample sizes, however their mean chi-squared was

454 similar and accordingly the max-FDR estimated in our IBS analysis was 0.02, which  
455 suggested no inflation of our results. Moreover, despite increasing considerably the  
456 effective sample size for IBS through the addition of multiple mental conditions, a  
457 number of outcomes were related with gastrointestinal-related phenotypes, which  
458 further supports this approach.

459

460 In summary, we identified novel risk loci for the IBS, reveal new insights of its  
461 polygenic architecture and extended previous knowledge on the genetic overlap and  
462 causal relationships between IBS, neuroticism, depression and anxiety. Overall, we  
463 advance our understanding of the biological mechanisms underlying IBS, highlighted  
464 candidate genes related to brain development and function as well as transcriptional  
465 regulation and provide insight into the association between IBS and comorbid mental  
466 disorders.

467

#### 468 **Abbreviations**

469 ADHD: attention-deficit/hyperactivity disorder; AIC: Akaike Information Criterion;  
470 ASD: autism spectrum disorders; ATC: Anatomical Therapeutic Chemical; CAUSE:  
471 Causal Analysis Using Summary Effect estimates; IBS: irritable bowel syndrome; FDR:  
472 false discovery rate; ELPD: expected log pointwise posterior density; FUMA:  
473 Functional Mapping and Annotation of GWAS; GCTA: Genome-wide Complex Trait  
474 Analysis; GWAS: Genome-wide association study; ,  $h^2_{\text{SNP}}$ : SNP heritability; LDSC:  
475 Linkage disequilibrium score regression; MAGMA: Generalized gene-set analysis of  
476 GWAS data; MTAG: Multi-Trait Analysis of GWAS

477

#### 478 **Declarations**

479 **Ethics approval and consent to participate**

480 This article contains results derived from data from human participants collected by  
481 several studies performed by previous studies. All participants gave informed consent in  
482 all the corresponding original studies. Our study is based on the large-scale GWAS  
483 datasets, and not the individual-level data. Hence, ethical approval was not applicable.

484

485 **Consent for publication**

486 Not applicable.

487

488 **Availability of data and material**

489 All data used in the current study is publicly available. Summary statistics for IBS can  
490 be download from European Bioinformatics Institute GWAS Catalog  
491 (<https://www.ebi.ac.uk/gwas/>). Summary statistics for neuroticism can be downloaded  
492 from [https://ctg.cncr.nl/software/summary\\_statistics/](https://ctg.cncr.nl/software/summary_statistics/) and <http://www.ccace.ed.ac.uk>.  
493 Summary statistics for depression can be downloaded from  
494 <https://datashare.ed.ac.uk/handle/10283/3203>. Summary statistics for anxiety can be  
495 downloaded from <http://www.nealelab.is/uk-biobank>. Genotype tissue expression  
496 (GTEx v8) portal: <http://www.gtexportal.org/home/datasets>. BRAINEAC:  
497 <http://www.braineac.org>. eQTL catalogue: <https://www.ebi.ac.uk/eql/Methods/>.  
498 PsychENCODE: <http://resource.psychencode.org>. CommonMind Consortium  
499 (CMC/CMC): <https://www.synapse.org/#!/Synapse:syn5585484>. WEB-based GENE  
500 SeT AnaLysis Toolkit (WebGestAlt): <http://www.webgestalt.org>.  
501 SNP heritability and genetic correlations: <https://github.com/bulik/ldsc>. MiXeR:  
502 <https://github.com/precimed/mixer>. Conditional analysis:  
503 <https://yanglab.westlake.edu.cn/software/gcta/#COJO>. Multi-Trait Analysis of GWAS

504 (MTAG): <https://github.com/omeed-maghzian/mtag>. Fine-mapping:  
505 <https://github.com/mulinlab/CAUSALdb-finemapping-pip>. Functional Mapping and  
506 Annotation of Genome-Wide Association Studies (FUMA): <https://fuma.ctglab.nl/>.  
507 Partitioned heritability: <https://github.com/bulik/ldsc/wiki/Partitioned-Heritability>. MR-  
508 Base database: [https://github.com/MRCIEU/mrbase\\_casestudies](https://github.com/MRCIEU/mrbase_casestudies). Causal Analysis  
509 Using Summary Effect estimates (CAUSE):  
510 <https://jean997.github.io/cause/pipeline.html>. The use of each software tools has been  
511 described in the Methods section. Analysis code and scripts used in the current study are  
512 available upon request from the corresponding authors.

513

#### 514 **Competing interests**

515 JARQ was on the speakers bureau and/or acted as consultant for Janssen-Cilag,  
516 Novartis, Shire, Takeda, Bial, Shionogi, Sincrolab, Novartis, BMS, Medice,  
517 Technofarma, Rubió and Raffo in the last 3 years. He also received travel awards (air  
518 tickets + hotel) for taking part in psychiatric meetings from Janssen-Cilag, Rubió, Shire,  
519 Takeda, Shionogi, Bial and Medice. The Department of Mental Health chaired by him  
520 received unrestricted educational and research support from the following companies in  
521 the last 3 years: Janssen- Cilag, Shire, Oryzon, Roche, Psious, and Rubió. ARU was on  
522 the speakers bureau and/or acted as consultant for Janssen-Cilag and Organon in the last  
523 two years. All other authors declare no biomedical financial interests or conflicts of  
524 interest. JS has served as consultant for Noventure SL, Devintecpharma, Aboca,  
525 Reckitt, Ipsen & Pileje and discloses present and past recent scientific collaborations  
526 with Salvat, Norgine, Alfa-Sigma, Cosmo, Adare, Ordesa and Danone that do not  
527 constitute a conflict of interest in developing the content of the present manuscript. MS  
528 was on the speakers bureau and/or acted as consultant/advisory Board member for

529 Tillotts, Menarini, Kyowa Kirin, Takeda, Biocodex, AlfaSigma, Sanofi, Janssen  
530 Immunology, Pfizer, Ferrer, BioGaia, Falk Foundation, Danone Nutricia Research,  
531 Ironwood, Genetic Analysis AS, DSM, Arena, Adnovate and Pharmanovia. He also  
532 was funded by Glycom/DSM research grants.

533

#### 534 **Funding**

535 This work was supported by the Agència de Gestió d'Ajuts Universitaris i de Recerca  
536 (AGAUR, 2017SGR-00444 and 2017SGR-1461); the Ministry of Science, Innovation  
537 and Universities (RYC2021-031324-I to J.C.D), the Instituto de Salud Carlos III  
538 (CP22/00128 to M.S.A and CP22/00026 to S.A) and the European Regional  
539 Development Fund (ERDF), the European Union H2020 Programme (H2020/2014-  
540 2020) under grant agreements no. 848228 (DISCOvERIE). This document is also an  
541 output of a project grant (Grant Agreement n°: 848228, DISCOvERIE) funded under  
542 H2020 Research Programme of the European Commission. The content of this  
543 document represents the views of the author(s) only and is his/her/their sole  
544 responsibility; it cannot be considered to reflect the views of the European Commission  
545 or any other body of the European Union. The European Commission do not accept any  
546 responsibility for use that may be made of the information it contains.

547

#### 548 **Authors' contributions**

549 SA, MSA, JC, LVR, NLL and MR designed and supervised the study. SA analyzed the  
550 data. SA, MSA, JC and MR wrote the manuscript draft. All authors contributed to the  
551 interpretation of results and critically reviewed the manuscript.



552 **Bibliography**

- 553 1. Canavan C, West J, Card T. The epidemiology of irritable bowel syndrome. Clin  
554 Epidemiol 2014;6:71-80. <http://dx.doi.org/10.2147/CLEP.S40245>.
- 555 2. Sperber AD, Bangdiwala SI, Drossman DA, et al. Worldwide Prevalence and  
556 Burden of Functional Gastrointestinal Disorders, Results of Rome Foundation  
557 Global Study. Gastroenterology 2021;160:99-114.e3.
- 558 3. Yeh H-W, Chien W-C, Chung C-H, et al. Risk of psychiatric disorders in irritable  
559 bowel syndrome-A nationwide, population-based, cohort study. Int J Clin Pract  
560 2018;72:e13212.
- 561 4. Ford AC, Moayyedi P, Chey WD, et al. American College of Gastroenterology  
562 Monograph on Management of Irritable Bowel Syndrome. Am J Gastroenterol  
563 2018;113:1-18.
- 564 5. Zamani M, Alizadeh-Tabari S, Zamani V. Systematic review with meta-analysis:  
565 the prevalence of anxiety and depression in patients with irritable bowel  
566 syndrome. Aliment Pharmacol Ther 2019;50:132-143.
- 567 6. Lee S, Wu J, Ma YL, et al. Irritable bowel syndrome is strongly associated with  
568 generalized anxiety disorder: a community study. Aliment Pharmacol Ther  
569 2009;30:643-651.
- 570 7. Lee C, Doo E, Choi JM, et al. The Increased Level of Depression and Anxiety in  
571 Irritable Bowel Syndrome Patients Compared with Healthy Controls: Systematic  
572 Review and Meta-analysis. J Neurogastroenterol Motil 2017;23:349.
- 573 8. Fond G, Loundou A, Hamdani N, et al. Anxiety and depression comorbidities in  
574 irritable bowel syndrome (IBS): a systematic review and meta-analysis. Eur Arch  
575 Psychiatry Clin Neurosci 2014;264:651-660.
- 576 9. Zhang QE, Wang F, Geng Q, et al. Depressive symptoms in patients with

- 577 irritable bowel syndrome: a meta-analysis of comparative studies. *Int J Biol Sci*  
578 2018;14:1504-1512.
- 579 10. Hazlett-Stevens H, Craske MG, Mayer EA, et al. Prevalence of irritable bowel  
580 syndrome among university students: The roles of worry, neuroticism, anxiety  
581 sensitivity and visceral anxiety. *J Psychosom Res* 2003;55:501-505.
- 582 11. Lydiard RB. Irritable bowel syndrome, anxiety, and depression: what are the  
583 links? *J Clin Psychiatry* 2001;62 Suppl 8:38-45; discussion 46-7.
- 584 12. Nisticò V, Rossi RE, D'Arrigo AM, et al. Functional Neuroimaging in Irritable  
585 Bowel Syndrome: A Systematic Review Highlights Common Brain Alterations  
586 With Functional Movement Disorders. *J Neurogastroenterol Motil* 2022;28:185-  
587 203.
- 588 13. Saffouri GB, Shields-Cutler RR, Chen J, et al. Small intestinal microbial  
589 dysbiosis underlies symptoms associated with functional gastrointestinal  
590 disorders. *Nat Commun* 2019;10.
- 591 14. Aguilera-Lizarraga J, Hussein H, Boeckxstaens GE. Immune activation in  
592 irritable bowel syndrome: what is the evidence? *Nat Rev Immunol* 2022.
- 593 15. Ford AC, Sperber AD, Corsetti M, et al. Irritable bowel syndrome. *Lancet*  
594 2020;396:1675-1688.  
595 <http://www.thelancet.com/article/S0140673620315488/fulltext>.
- 596 16. Smoller JW. The Genetics of Stress-Related Disorders: PTSD, Depression, and  
597 Anxiety Disorders. *Neuropsychopharmacology* 2016;41:297-319.
- 598 17. Sullivan PF, Neale MC, Kendler KS. Genetic epidemiology of major depression:  
599 review and meta-analysis. *Am J Psychiatry* 2000;157:1552-1562.
- 600 18. Eijsbouts C, Zheng T, Kennedy NA, et al. Genome-wide analysis of 53,400  
601 people with irritable bowel syndrome highlights shared genetic pathways with

- 602 mood and anxiety disorders. *Nat Genet* 2021;53:1543-1552.
- 603 19. Wu Y, Murray GK, Byrne EM, et al. GWAS of peptic ulcer disease implicates  
604 *Helicobacter pylori* infection, other gastrointestinal disorders and depression. *Nat*  
605 *Commun* 2021;12:1146.
- 606 20. Nagel M, Jansen PR, Stringer S, et al. Meta-analysis of genome-wide association  
607 studies for neuroticism in 449,484 individuals identifies novel genetic loci and  
608 pathways. *Nat Genet* 2018;50:920-927.
- 609 21. Howard DM, Adams MJ, Clarke TK, et al. Genome-wide meta-analysis of  
610 depression identifies 102 independent variants and highlights the importance of  
611 the prefrontal brain regions. *Nat Neurosci* 2019;22:343-352.
- 612 22. Bulik-Sullivan BK, Loh P-R, Finucane HK, et al. LD Score regression  
613 distinguishes confounding from polygenicity in genome-wide association studies.  
614 *Nat Genet* 2015;47:291-295.
- 615 23. Frei O, Holland D, Smeland OB, et al. Bivariate causal mixture model quantifies  
616 polygenic overlap between complex traits beyond genetic correlation. *Nat*  
617 *Commun* 2019 101 2019;10:1-11.
- 618 24. Turley P, Walters RK, Maghzian O, et al. Multi-trait analysis of genome-wide  
619 association summary statistics using MTAG. *Nat Genet* 2018;50:229-237.
- 620 25. Maihofer AX, Choi KW, Coleman JRI, et al. Enhancing Discovery of Genetic  
621 Variants for Posttraumatic Stress Disorder Through Integration of Quantitative  
622 Phenotypes and Trauma Exposure Information. *Biol Psychiatry* 2022;91:626-  
623 636.
- 624 26. Yang J, Ferreira T, Morris AP, et al. Conditional and joint multiple-SNP analysis  
625 of GWAS summary statistics identifies additional variants influencing complex  
626 traits. *Nat Genet* 2012;44:369-375, S1-3.

- 627 27. Benner C, Spencer CCA, Havulinna AS, et al. FINEMAP: efficient variable  
628 selection using summary data from genome-wide association studies.  
629 *Bioinformatics* 2016;32:1493-1501.
- 630 28. Greenbaum J, Deng HW. A Statistical Approach to Fine Mapping for the  
631 Identification of Potential Causal Variants Related to Bone Mineral Density. *J*  
632 *Bone Miner Res* 2017;32:1651-1658.
- 633 29. Chen W, Larrabee BR, Ovsyannikova IG, et al. Fine Mapping Causal Variants  
634 with an Approximate Bayesian Method Using Marginal Test Statistics. *Genetics*  
635 2015;200:719-736.
- 636 30. Wang J, Huang D, Zhou Y, et al. CAUSALdb: a database for disease/trait causal  
637 variants identified using summary statistics of genome-wide association studies.  
638 *Nucleic Acids Res* 2020;48:D807-D816.
- 639 31. Watanabe K, Taskesen E, Van Bochoven A, et al. Functional mapping and  
640 annotation of genetic associations with FUMA. *Nat Commun* 2017;8:1826.
- 641 32. de Leeuw CA, Mooij JM, Heskes T, et al. MAGMA: Generalized Gene-Set  
642 Analysis of GWAS Data. *PLoS Comput Biol* 2015;11:e1004219.
- 643 33. Liao Y, Wang J, Jaehnig EJ, et al. WebGestalt 2019: gene set analysis toolkit  
644 with revamped UIs and APIs. *Nucleic Acids Res* 2019;47:W199-W205.
- 645 34. Finucane HK, Bulik-Sullivan B, Gusev A, et al. Partitioning heritability by  
646 functional annotation using genome-wide association summary statistics. *Nat*  
647 *Genet* 2015;47.
- 648 35. Hemani G, Zheng J, Elsworth B, et al. The MR-base platform supports  
649 systematic causal inference across the human phenome. *Elife* 2018;7:e34408.
- 650 36. Morrison J, Knoblauch N, Marcus JH, et al. Mendelian randomization accounting  
651 for correlated and uncorrelated pleiotropic effects using genome-wide summary

- 652 statistics. *Nat Genet* 2020;52:740-747.
- 653 37. Nagel M, Jansen PR, Stringer S, et al. Meta-analysis of genome-wide association  
654 studies for neuroticism in 449,484 individuals identifies novel genetic loci and  
655 pathways. *Nat Genet* 2018 507 2018;50:920-927.
- 656 38. Luciano M, Hagenaars SP, Davies G, et al. Association analysis in over 329,000  
657 individuals identifies 116 independent variants influencing neuroticism. *Nat*  
658 *Genet* 2018;50:6-11.
- 659 39. Anttila V, Bulik-Sullivan B, Finucane HK, et al. Analysis of shared heritability in  
660 common disorders of the brain. *Science* 2018;360.
- 661 40. Boutwell B, Hinds D, Agee M, et al. Replication and characterization of *CADM2*  
662 and *MSRA* genes on human behavior. *Heliyon* 2017;3.
- 663 41. Lüthi A, Laurent JP, Figurovt A, et al. Hippocampal long-term potentiation and  
664 neural cell adhesion molecules L1 and NCAM. *Nature* 1994;372:777-779.
- 665 42. Downer EJ, Cowley TR, Lyons A, et al. A novel anti-inflammatory role of  
666 NCAM-derived mimetic peptide, FGL. *Neurobiol Aging* 2010;31:118-128.
- 667 43. Turner CA, Lyons DM, Buckmaster CL, et al. Neural cell adhesion molecule  
668 peptide mimetics modulate emotionality: pharmacokinetic and behavioral studies  
669 in rats and non-human primates. *Neuropsychopharmacol* 2018 442 2018;44:356-  
670 363.
- 671 44. Fregeau B, Kim BJ, Hernández-García A, et al. De Novo Mutations of RERE  
672 Cause a Genetic Syndrome with Features that Overlap Those Associated with  
673 Proximal 1p36 Deletions. *Am J Hum Genet* 2016;98:963.
- 674 45. Jordan VK, Fregeau B, Ge X, et al. Genotype–phenotype correlations in  
675 individuals with pathogenic RERE variants. *Hum Mutat* 2018;39:666.
- 676 46. Wray NR, Ripke S, Mattheisen M, et al. Genome-wide association analyses

- 677 identify 44 risk variants and refine the genetic architecture of major depression.  
678 Nat Genet 2018 505 2018;50:668-681.
- 679 47. Mbarek H, Milaneschi Y, Hottenga JJ, et al. Genome-Wide Significance for  
680 PCLO as a Gene for Major Depressive Disorder. Twin Res Hum Genet  
681 2017;20:267-270.
- 682 48. Hyde CL, Nagle MW, Tian C, et al. Identification of 15 genetic loci associated  
683 with risk of major depression in individuals of European descent. Nat Genet  
684 2016;48:1031-1036.
- 685 49. Lee PH, Anttila V, Won H, et al. Genomic Relationships, Novel Loci, and  
686 Pleiotropic Mechanisms across Eight Psychiatric Disorders. Cell 2019;179:1469-  
687 1482.e11.
- 688 50. Ayano G. Dopamine: Receptors, Functions, Synthesis, Pathways, Locations and  
689 Mental Disorders: Review of Literatures. J Ment Disord Treat 2016;2.
- 690 51. Kurnik-Łucka M, Pasięka P, Łączak P, et al. Gastrointestinal dopamine in  
691 inflammatory bowel diseases: A systematic review. Int J Mol Sci 2021;22.
- 692 52. Tolstanova G, Deng X, Ahluwalia A, et al. Role of Dopamine and D2 Dopamine  
693 Receptor in the Pathogenesis of Inflammatory Bowel Disease. Dig Dis Sci  
694 2015;60:2963-2975.
- 695 53. Beck HC, Nielsen EC, Matthiesen R, et al. Quantitative proteomic analysis of  
696 post-translational modifications of human histones. Mol Cell Proteomics  
697 2006;5:1314-1325.
- 698 54. Aguirre JE, Winston JH, Sarna SK. Neonatal immune challenge followed by  
699 adult immune challenge induces epigenetic-susceptibility to aggravated visceral  
700 hypersensitivity. Neurogastroenterol Motil 2017;29:e13081.
- 701 55. Moloney RD, Stilling RM, Dinan TG, et al. Early-life stress-induced visceral

- 702 hypersensitivity and anxiety behavior is reversed by histone deacetylase  
703 inhibition. *Neurogastroenterol Motil* 2015;27:1831-1836.
- 704 56. Vicario M, Martínez C, Santos J. Role of microRNA in IBS with increased gut  
705 permeability. *Gut* 2010;59:710-712.
- 706 57. Martínez C, Rodinõ-Janeiro BK, Lobo B, et al. Original article: miR-16 and miR-  
707 125b are involved in barrier function dysregulation through the modulation of  
708 claudin-2 and cingulin expression in the jejunum in IBS with diarrhoea. *Gut*  
709 2017;66:1537.
- 710 58. Wohlfarth C, Schmitteckert S, Härtle JD, et al. miR-16 and miR-103 impact 5-  
711 HT4 receptor signalling and correlate with symptom profile in irritable bowel  
712 syndrome. *Sci Rep* 2017;7:19.
- 713 59. Hong S, Zheng G, Wiley JW. Epigenetic regulation of genes that modulate  
714 chronic stress-induced visceral pain in the peripheral nervous system.  
715 *Gastroenterology* 2015;148:148-157.e7.
- 716 60. Tran L, Schulkin J, Ligon CO, et al. Epigenetic modulation of chronic anxiety  
717 and pain by histone deacetylation. *Mol Psychiatry* 2015;20:1219-1231.
- 718 61. Staudacher HM, Mikocka-Walus A, Ford AC. Common mental disorders in  
719 irritable bowel syndrome: pathophysiology, management, and considerations for  
720 future randomised controlled trials. *Lancet Gastroenterol Hepatol* 2021;6:401-  
721 410.
- 722 62. Carabotti M, Scirocco A, Maselli MA, et al. The gut-brain axis: interactions  
723 between enteric microbiota, central and enteric nervous systems. *Ann*  
724 *Gastroenterol Q Publ Hell Soc Gastroenterol* 2015;28:203.
- 725 63. Fadgyas-Stanculete M, Buga A-M, Popa-Wagner A, et al. The relationship  
726 between irritable bowel syndrome and psychiatric disorders: from molecular

- 727 changes to clinical manifestations. *J Mol Psychiatry* 2014;2.
- 728 64. Evrensel A, Ceylan ME. The Gut-Brain Axis: The Missing Link in Depression.  
729 *Clin Psychopharmacol Neurosci* 2015;13:239-244.
- 730 65. Smriga M, Torii K. L-Lysine acts like a partial serotonin receptor 4 antagonist  
731 and inhibits serotonin-mediated intestinal pathologies and anxiety in rats. *Proc*  
732 *Natl Acad Sci U S A* 2003;100:15370-15375.
- 733 66. Bharucha AE, Zinsmeister AR, Camilleri M, et al. Effects of a serotonin 5-HT<sub>4</sub>  
734 receptor antagonist SB-207266 on gastrointestinal motor and sensory function in  
735 humans. *Gut* 2000;47:667-674.
- 736 67. Tam FS-, Hillier K, Bunce KT. Characterization of the 5-hydroxytryptamine  
737 receptor type involved in inhibition of spontaneous activity of human isolated  
738 colonic circular muscle. *Br J Pharmacol* 1994;113:143-150.
- 739 68. Papakostas GI, Mischoulon D, Shyu I, et al. S-adenosyl methionine (SAME)  
740 augmentation of serotonin reuptake inhibitors for antidepressant nonresponders  
741 with major depressive disorder: A double-blind, randomized clinical trial. *Am J*  
742 *Psychiatry* 2010;167:942-948.
- 743 69. Sharma A, Gerbarg P, Bottiglieri T, et al. S-adenosylmethionine (SAME) for  
744 neuropsychiatric disorders: A clinician-oriented review of research. *J Clin*  
745 *Psychiatry* 2017;78:e656-e667. <https://pubmed.ncbi.nlm.nih.gov/28682528/>.  
746 Accessed May 18, 2022.
- 747 70. Moreau B, Clement P, Theoret Y, et al. Allopurinol in combination with  
748 thiopurine induces mucosal healing and improves clinical and metabolic  
749 outcomes in IBD. *Therap Adv Gastroenterol* 2017;10:819-827.
- 750 71. Lee YT, Hu LY, Shen CC, et al. Risk of psychiatric disorders following irritable  
751 bowel syndrome: A nationwide population-based cohort study. *PLoS One*



752 2015;10:e0133283.

753 72. Sibelli A, Chalder T, Everitt H, et al. A systematic review with meta-analysis of  
754 the role of anxiety and depression in irritable bowel syndrome onset. Psychol  
755 Med 2016;46:3065-3080.

756 73. Goodwin L, White PD, Hotopf M, et al. Life course study of the etiology of self-  
757 reported irritable bowel syndrome in the 1958 British birth cohort. Psychosom  
758 Med 2013;75:202-210.

759

760

761

762

763 **Figure legends**

764

765 **Figure 1. MTAG results of IBS and overlap with previous GWAS on IBS,**  
766 **neuroticism, depression and anxiety.** a) Z-scores of MTAG-IBS and original GWAS  
767 on IBS, neuroticism, depression and anxiety for each of the independent lead SNPs  
768 (n=42) found in MTAG-IBS results. Dotted grey line indicates 0 Z-score and solid grey  
769 lines indicate statistical significance at  $P < 5 \cdot 10^{-8}$ . b) Manhattan plot of the MTAG-IBS  
770 results. Dotted grey line indicates statistical significance at  $P < 5 \cdot 10^{-8}$ . c) QQ plot of the  
771 MTAG-IBS results. d) Venn diagram depicting overlap among MTAG-IBS independent  
772 lead SNPs and genome-wide significant hits in the original GWAS.

773

774 **Figure 2. Follow-up analysis of MTAG-IBS results and causal analysis.** a)  
775 Functional annotation of the credible variants associated with MTAG-IBS. b)  
776 RegulomeDB scores of the credible variants associated with MTAG-IBS. Low scores  
777 indicate increasing likelihood of having regulatory function. c) Distribution of the  
778 credible variants associated with MTAG-IBS across 15 categories of minimum  
779 chromatin state. Lower state indicating higher accessibility and states from 1 to 7 refer  
780 to open chromatin states. d) Genetic correlations ( $r_g$ ) between MTAG-IBS results and  
781 17 phenotypes involving digestive, immunological and psychiatric disorders. Only  
782 significant correlations after Bonferroni correction are displayed. e) Bar graphs  
783 depicting the size of the genomic locus (left), number of candidate SNPs in the locus  
784 (center) and number of mapped genes in the genomic locus (right). Genomic loci are  
785 displayed by “chromosome: start position-end position”. f) Partitioning of the SNP  
786 heritability of the MTAG-IBS results using LD Score regression. Enrichment was  
787 calculated by dividing the partial heritability of a category by the proportion of SNPs in

788 that category (proportion indicated by color). Only significant enrichments are  
789 displayed. g) Causal relationships between IBS and neuroticism, depression and anxiety  
790 assessed using Causal Analysis Using Summary Effect estimates (CAUSE). Only  
791 associations with evidence of causal relationship are displayed.

**Table 1.** Summary of the GWAS datasets used in the current study.

| Phenotype                    | N cases | N controls | N total               | N effective <sup>a</sup> | GWAS Hits <sup>b</sup> | Reference                     |
|------------------------------|---------|------------|-----------------------|--------------------------|------------------------|-------------------------------|
| <b>IBS</b>                   | 53,400  | 433,201    | 486,601               | 190,159                  | 6                      | 18                            |
| <b>Neuroticism</b>           | -       | -          | □390,278 <sup>c</sup> | □390,278                 | 136 <sup>d</sup>       | 20                            |
| <b>Depression</b>            | 170,756 | 329,443    | 500,199 <sup>c</sup>  | 449,856                  | 102 <sup>d</sup>       | 21                            |
| <b>Anxiety nerves or GAD</b> | 16,730  | 101,021    | 117,751               | 57,412                   | 1                      | UKBB phenotype code: 20544_15 |

NOTE: GAD generalized anxiety disorder; UKBB UK Biobank.

<sup>a</sup> N effective sample sizes were calculated following the equation:  $N_{eff} = 4 / (1/N_{cases} + 1/N_{controls})$ .

<sup>b</sup> Number of genome-wide significant independent loci.

<sup>c</sup> Sample size excluding the 23andMe cohort.

<sup>d</sup> Hits including the 23andMe cohort.

**Table 2.** Genetic correlation estimates for IBS and neuroticism, depression and anxiety using Linkage Disequilibrium Score Regression (LDSC).

| Trait 1 | Trait 2     | Genetic Correlation | SE    | Z      | P-value   | Intercept (SE) | Trait 1       | Trait 2       |
|---------|-------------|---------------------|-------|--------|-----------|----------------|---------------|---------------|
|         |             |                     |       |        |           |                | $h^2$ (SE)    | $h^2$ (SE)    |
| IBS     | Neuroticism | 0.526               | 0.027 | 19.298 | 5.54E-83  | 1.013 (0.013)  | 0.069 (0.004) | 0.146 (0.005) |
| IBS     | Depression  | 0.587               | 0.026 | 22.714 | 3.23E-114 | 0.992 (0.01)   | 0.069 (0.004) | 0.099 (0.004) |
| IBS     | Anxiety     | 0.677               | 0.065 | 10.360 | 3.75E-25  | 0.999 (0.74)   | 0.068 (0.004) | 0.083 (0.011) |

NOTE: SE, standard error;  $h^2$ , heritability.

**Table 3.** Results for the 42 independent lead SNPs identified in the MTAG-IBS analysis.

| Locus | Lead SNP    | CHR | A1/A2 | BP        | Cross-trait analysis |       |          | FRQ   | Nearest Gene         | Functional category | Overlap with original GWAS IBS | Overlap with previous GWAs on psychiatric traits | Overlap with previous GWAs | CADD  | RDB |
|-------|-------------|-----|-------|-----------|----------------------|-------|----------|-------|----------------------|---------------------|--------------------------------|--------------------------------------------------|----------------------------|-------|-----|
|       |             |     |       |           | Beta                 | SE    | P        |       |                      |                     |                                |                                                  |                            |       |     |
| 1     | rs301806    | 1   | T/C   | 8482078   | -0.009               | 0.002 | 1.67E-09 | 0.58  | <i>RERE</i>          | intronic            | NO                             | <i>Neuroticism</i>                               | <i>Known</i>               | 0.117 | 4   |
| 2     | rs11206127  | 1   | A/G   | 53713549  | -0.009               | 0.002 | 1.42E-08 | 0.43  | <i>LRP8</i>          | intronic            | NO                             | <i>No</i>                                        | <i>Novel</i>               | 0.128 | 6   |
| 3     | rs12755507  | 1   | T/C   | 176164865 | 0.01                 | 0.002 | 8.03E-10 | 0.625 | <i>RFWD2</i>         | intronic            | NO                             | <i>Depression</i>                                | <i>Known</i>               | 6.038 | 4   |
| 4     | rs113198479 | 1   | A/G   | 191347803 | -0.02                | 0.004 | 2.48E-08 | 0.953 | <i>RP11-309H21.2</i> | intergenic          | NO                             | <i>No</i>                                        | <i>Novel</i>               | 1.241 | 6   |
| 5     | rs72740550  | 1   | A/G   | 197342380 | -0.011               | 0.002 | 6.02E-09 | 0.219 | <i>CRB1</i>          | intronic            | NO                             | <i>Neuroticism &amp; depression</i>              | <i>Known</i>               | 5.063 | 7   |
| 6     | rs115962846 | 2   | A/G   | 58967058  | -0.015               | 0.003 | 3.68E-08 | 0.912 | <i>LINC01122</i>     | ncRNA_intronic      | NO                             | <i>Neuroticism</i>                               | <i>Known</i>               | 2.103 | 7   |
| 7     | rs28496790  | 2   | A/C   | 161950047 | 0.01                 | 0.002 | 3.70E-09 | 0.708 | <i>AC009313.1</i>    | intergenic          | NO                             | <i>No</i>                                        | <i>Novel</i>               | 6.027 | 5   |
| 8     | rs138218528 | 2   | T/C   | 212676884 | 0.009                | 0.002 | 2.84E-08 | 0.667 | <i>ERBB4</i>         | intronic            | NO                             | <i>Neuroticism &amp; depression</i>              | <i>Known</i>               | 8.481 | 6   |
| 9     | rs62246276  | 3   | T/G   | 9445173   | -0.011               | 0.002 | 2.28E-08 | 0.179 | <i>SETD5</i>         | intronic            | NO                             | <i>No</i>                                        | <i>Novel</i>               | 1.944 | 5   |
| 10    | rs67416405  | 3   | T/C   | 85539234  | -0.009               | 0.002 | 8.27E-09 | 0.353 | <i>CADM2</i>         | intronic            | YES                            | <i>No</i>                                        | <i>Known</i>               | 3.769 | 6   |
| 11    | rs1729951   | 3   | T/G   | 136500733 | -0.009               | 0.002 | 9.01E-09 | 0.389 | <i>RP11-102M11.2</i> | intergenic          | NO                             | <i>Neuroticism</i>                               | <i>Known</i>               | 0.078 | NA  |

|    |             |   |     |           |        |       |          |       |                         |                |     |                          |       |       |    |
|----|-------------|---|-----|-----------|--------|-------|----------|-------|-------------------------|----------------|-----|--------------------------|-------|-------|----|
| 12 | rs1442129   | 4 | A/G | 90849446  | -0.009 | 0.002 | 1.22E-08 | 0.453 | <i>MMRNI</i>            | intronic       | NO  | No                       | Novel | 5.378 | NA |
| 13 | rs77087420  | 4 | A/G | 123122856 | 0.018  | 0.003 | 2.64E-08 | 0.945 | <i>KIAA1109</i>         | intronic       | NO  | No                       | Novel | 4.579 | 7  |
| 14 | rs12513440  | 5 | A/G | 7259853   | 0.01   | 0.002 | 2.73E-08 | 0.243 | <i>RP11-404K5.3</i>     | intergenic     | NO  | No                       | Novel | 0.327 | 5  |
| 15 | rs3099439   | 5 | T/C | 87545318  | -0.011 | 0.002 | 1.14E-12 | 0.539 | <i>TMEM161B</i>         | intronic       | NO  | Depression               | Known | 1.562 | NA |
| 16 | rs4481363   | 5 | A/C | 164474719 | 0.009  | 0.001 | 1.01E-09 | 0.524 | <i>CTC-340A15.2</i>     | ncRNA_intronic | NO  | Neuroticism & depression | Known | 6.522 | 6  |
| 16 | rs180928232 | 5 | A/G | 166185949 | -0.012 | 0.002 | 4.46E-08 | 0.149 | <i>CTB-7E3.1</i>        | intergenic     | NO  | Neuroticism              | Known | 2.692 | 6  |
| 17 | rs200977    | 6 | T/C | 27854301  | 0.015  | 0.002 | 1.04E-11 | 0.873 | <i>HIST1H3J</i>         | intergenic     | NO  | Neuroticism & depression | Known | 1.251 | NA |
| 17 | rs2534664   | 6 | A/G | 31469591  | 0.01   | 0.002 | 2.63E-10 | 0.456 | <i>MICB</i>             | intronic       | NO  | Depression               | Known | 3.484 | NA |
| 17 | rs1144708   | 6 | T/C | 31710020  | -0.01  | 0.002 | 7.49E-10 | 0.357 | <i>MSH5:MSH5-SAPCD1</i> | intronic       | YES | No                       | Known | 0.372 | 6  |
| 18 | rs12374612  | 6 | T/C | 100955752 | 0.009  | 0.001 | 1.02E-08 | 0.478 | <i>ASCC3</i>            | downstream     | NO  | Neuroticism              | Known | 0.29  | 6  |
| 19 | rs2189246   | 7 | A/G | 82444372  | 0.01   | 0.001 | 1.98E-10 | 0.523 | <i>PCLO</i>             | intronic       | NO  | Depression               | Known | 1.139 | 7  |
| 20 | rs6956352   | 7 | A/G | 109131367 | 0.009  | 0.002 | 1.64E-08 | 0.458 | <i>AC073071.1</i>       | intergenic     | NO  | Depression               | Known | 9.195 | 7  |
| 21 | rs4726814   | 7 | T/C | 146691924 | -0.01  | 0.002 | 1.30E-08 | 0.275 | <i>CNTNAP2</i>          | intronic       | NO  | No                       | Novel | 1.37  | 7  |
| 22 | rs4478545   | 8 | A/G | 94672542  | -0.01  | 0.002 | 4.77E-09 | 0.285 | <i>LINC00535</i>        | ncRNA_intronic | NO  | No                       | Novel | 1.326 | 6  |
| 23 | rs3793577   | 9 | A/G | 23737627  | -0.01  | 0.002 | 3.46E-10 | 0.463 | <i>ELAVL2</i>           | intronic       | NO  | Neuroticism              | Known | 19.76 | 5  |
| 24 | rs4744242   | 9 | T/G | 96236711  | -0.011 | 0.002 | 8.68E-13 | 0.336 | <i>FAM120A</i>          | intronic       | YES | Neuroticism              | Known | 2.858 | 6  |
| 25 | rs10123941  | 9 | T/C | 120518162 | -0.01  | 0.002 | 3.96E-09 | 0.727 | <i>snoZ13_snr52</i>     | intergenic     | NO  | Neuroticism              | Known | 1.108 | 6  |

|    |            |    |     |           |        |       |          |       |                      |                |     |                                     |              |       |    |
|----|------------|----|-----|-----------|--------|-------|----------|-------|----------------------|----------------|-----|-------------------------------------|--------------|-------|----|
| 26 | rs6584631  | 10 | T/C | 106656137 | -0.01  | 0.002 | 7.23E-09 | 0.244 | <i>SORCS3</i>        | intronic       | NO  | <i>Depression</i>                   | <i>Known</i> | 0.167 | 4  |
| 27 | rs4937872  | 11 | A/G | 112827715 | -0.012 | 0.002 | 7.15E-15 | 0.589 | <i>RP11-629G13.1</i> | intergenic     | YES | <i>Neuroticism</i>                  | <i>Known</i> | 0.044 | 6  |
| 28 | rs9530139  | 13 | T/C | 31847324  | -0.011 | 0.002 | 2.11E-08 | 0.194 | <i>B3GALTL</i>       | intronic       | NO  | <i>Depression</i>                   | <i>Known</i> | 0.529 | 6  |
| 29 | rs9597797  | 13 | T/G | 59183795  | -0.01  | 0.002 | 1.42E-09 | 0.251 | <i>CTAGE16P</i>      | intergenic     | NO  | <i>Neuroticism</i>                  | <i>Known</i> | 0.278 | 7  |
| 30 | rs2121708  | 14 | A/G | 42146572  | -0.009 | 0.001 | 8.26E-10 | 0.517 | <i>LRFN5</i>         | intronic       | NO  | <i>Depression</i>                   | <i>Known</i> | 0.043 | NA |
| 31 | rs35641442 | 14 | A/G | 75207263  | 0.009  | 0.002 | 6.65E-09 | 0.459 | <i>FCF1</i>          | intergenic     | NO  | <i>Neuroticism &amp; depression</i> | <i>Known</i> | 11.4  | 7  |
| 32 | rs1862743  | 16 | A/C | 60743834  | -0.009 | 0.001 | 1.08E-08 | 0.492 | <i>GNPATP</i>        | intergenic     | NO  | <i>No</i>                           | <i>Novel</i> | 1.06  | 6  |
| 33 | rs2978362  | 18 | T/C | 32959397  | -0.008 | 0.001 | 2.65E-08 | 0.527 | <i>ZNF396</i>        | intergenic     | NO  | <i>Depression</i>                   | <i>Known</i> | 1.024 | NA |
| 33 | rs11877758 | 18 | T/G | 35138110  | -0.012 | 0.002 | 1.28E-13 | 0.692 | <i>CELF4</i>         | intronic       | NO  | <i>Neuroticism &amp; depression</i> | <i>Known</i> | 2.718 | 7  |
| 34 | rs17410557 | 18 | T/C | 50776391  | -0.009 | 0.002 | 1.13E-08 | 0.606 | <i>DCC</i>           | intronic       | NO  | <i>Neuroticism &amp; depression</i> | <i>Known</i> | 4.502 | 7  |
| 34 | rs12958048 | 18 | A/G | 53101598  | 0.01   | 0.002 | 4.76E-11 | 0.333 | <i>TCF4</i>          | intronic       | NO  | <i>Neuroticism</i>                  | <i>Known</i> | 2.08  | 5  |
| 35 | rs2111530  | 19 | A/G | 31891006  | -0.009 | 0.002 | 9.47E-09 | 0.602 | <i>AC007796.1</i>    | ncRNA_intronic | NO  | <i>No</i>                           | <i>Novel</i> | 17.04 | 7  |
| 36 | rs2024568  | 20 | T/C | 44732089  | 0.011  | 0.002 | 1.52E-10 | 0.246 | <i>RPL13P2</i>       | intergenic     | NO  | <i>Neuroticism &amp; depression</i> | <i>Known</i> | 0.149 | 6  |
| 37 | rs11090039 | 22 | A/G | 41496800  | 0.012  | 0.002 | 2.87E-13 | 0.284 | <i>EP300</i>         | intronic       | NO  | <i>Neuroticism</i>                  | <i>Known</i> | 9.707 | 5  |

NOTE: CHR, chromosome; A1, effect allele with respect to the Beta; A2, alternate allele; BP, base pair position; SE, standard error; FRQ, frequency of the A1; CADD, Combined Annotation Dependent Depletion score; RDB, RegulomeDB score.



---

Overlap with previous GWAS was examined by identifying hits within +/-5000kb in the MTAG-hits for IBS and original GWAS hits for each trait (i.e. neuroticism, depression and anxiety). If there were overlapping SNPs within this distance, they were considered independent signal if  $r^2 > 0.2$ . The independent signals identified (indicated as novel) were further confirmed using conditonal analysis.



a)

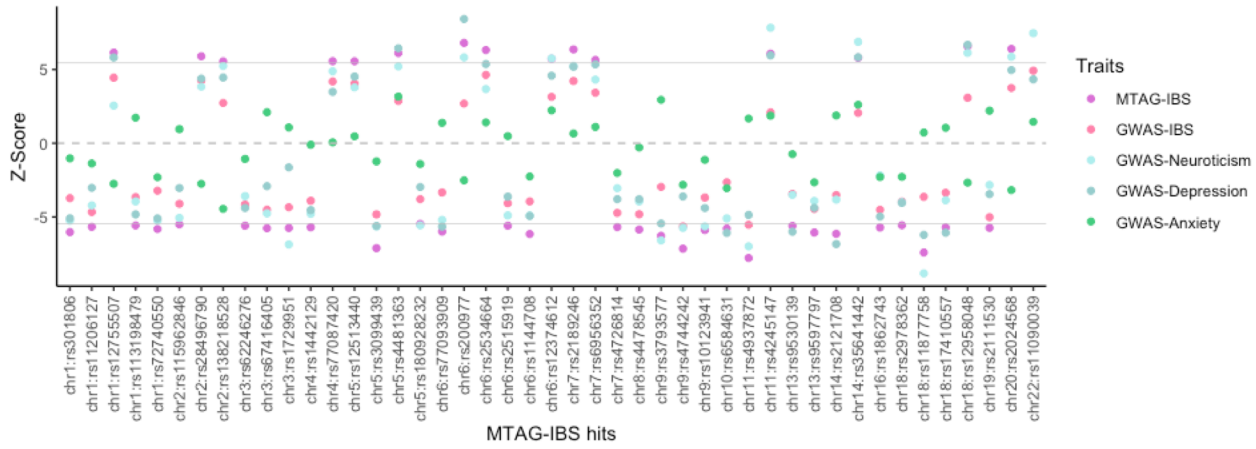

b)

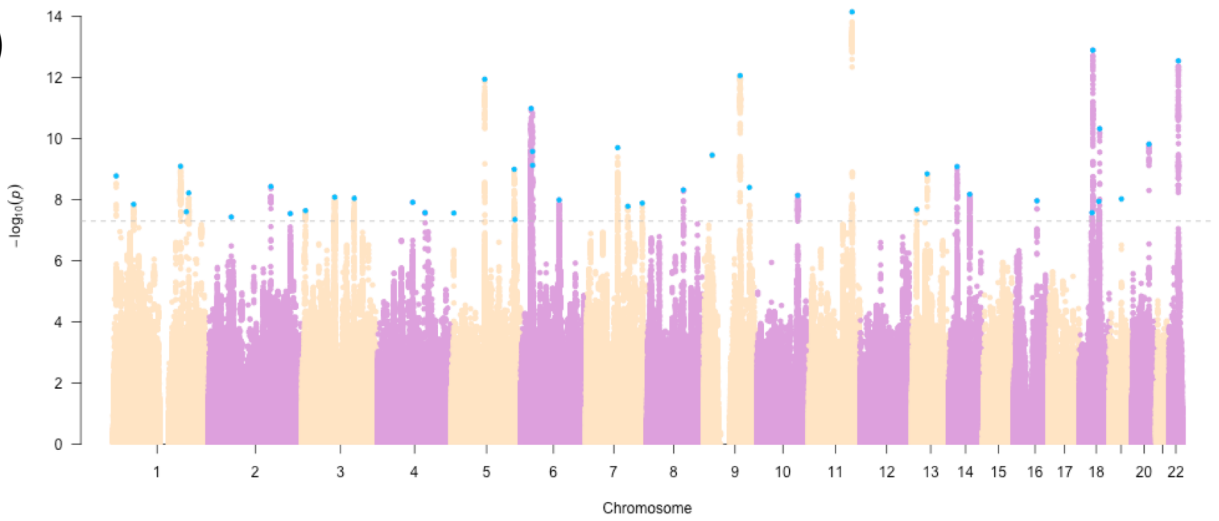

c)

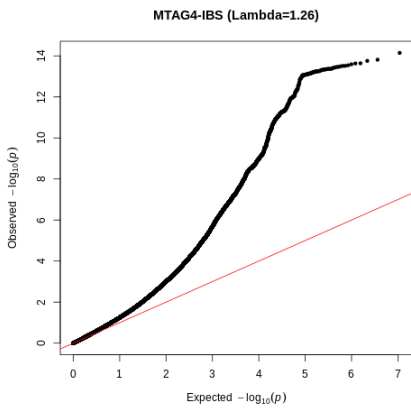

d)

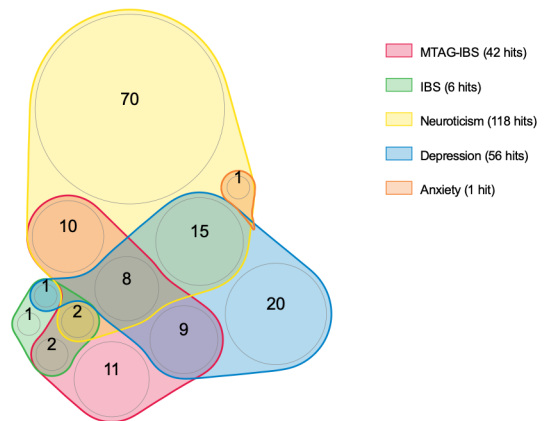

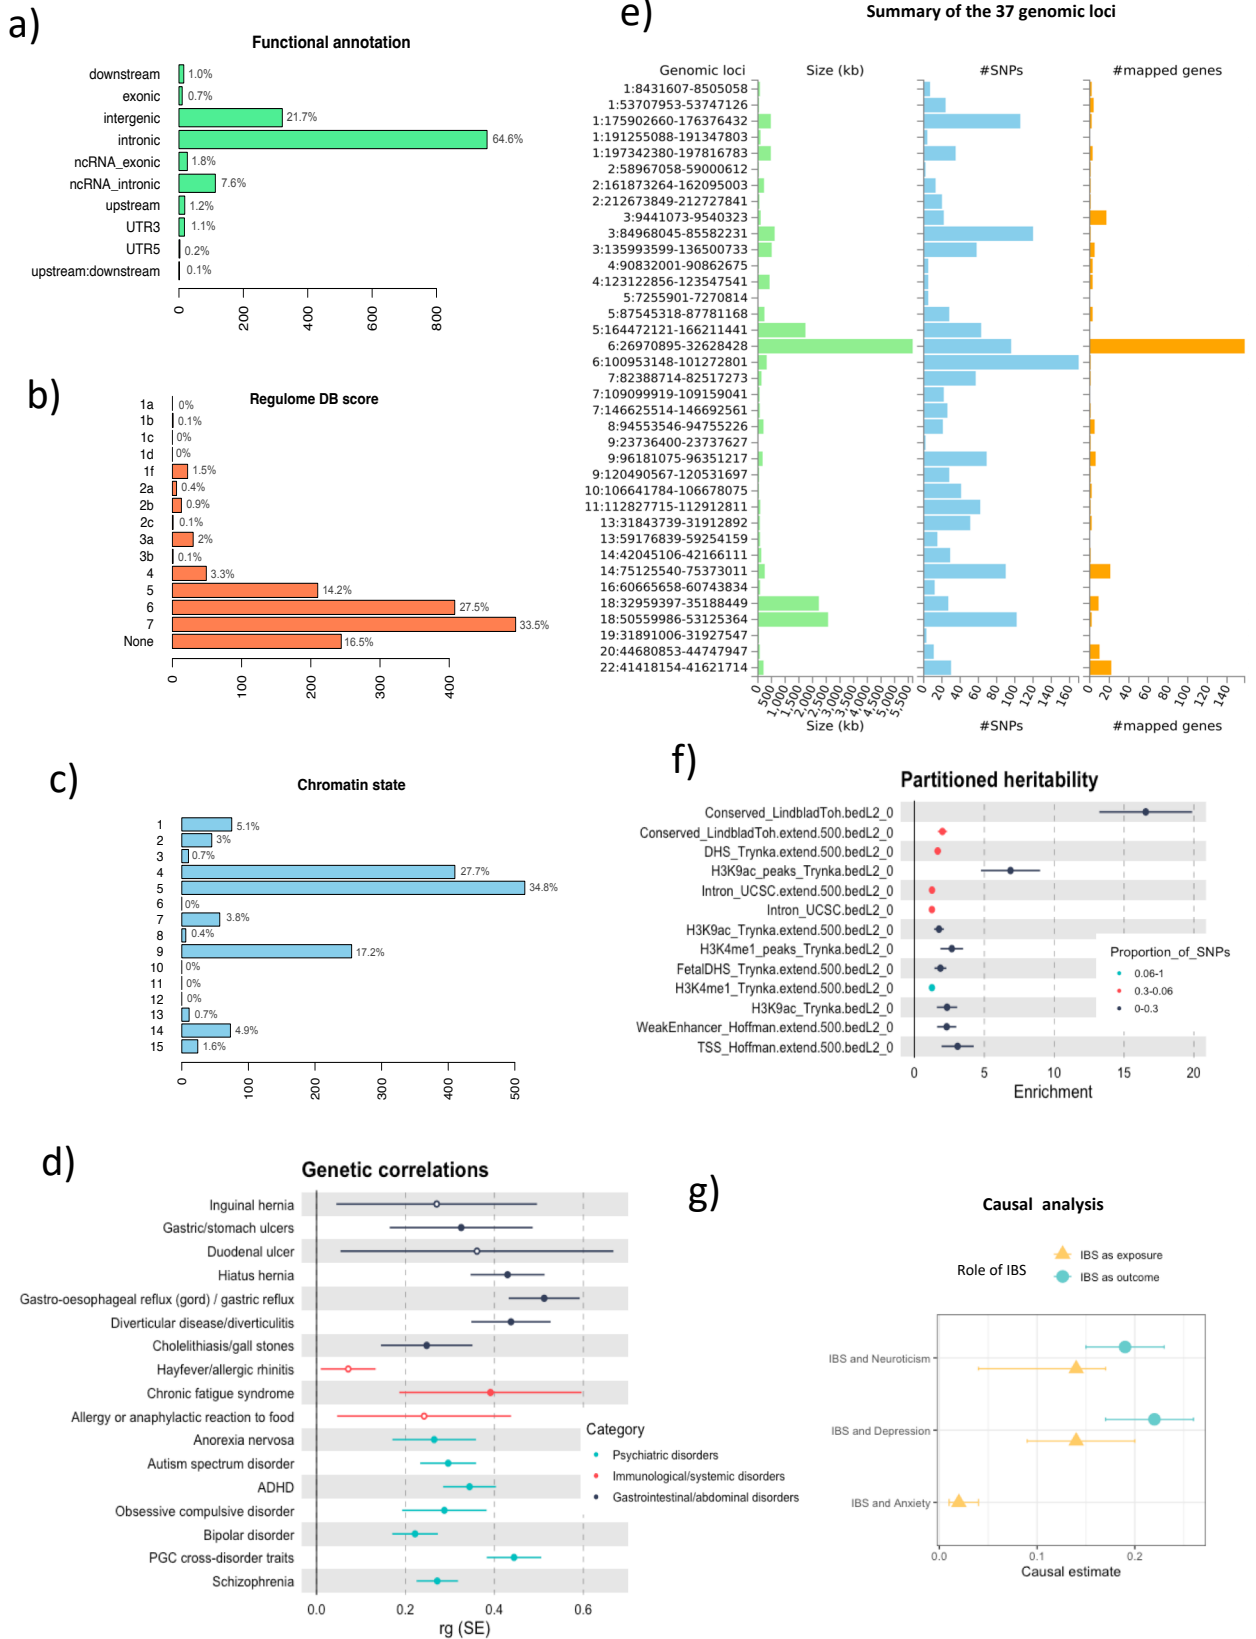

Source: https://medrxiv.org/content/10.1101/2023.01.30.23285080v1.full.pdf
